# Supplementary material
Source: PubMed Central journal article supplement (PMC3865049)
Supplement: cc-12-2598-s01.pdf [file cc-12-2598-s01.pdf]

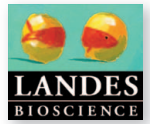

## **Supplemental Material to:**

**Serena Giovinazzi, Dhruv Bellapu, Viacheslav M Morozov,  
and Alexander M Ishov**

**Targeting mitotic exit with hyperthermia or APC/C  
inhibition to increase paclitaxel efficacy**

**Cell Cycle 2013; 12(16)**

**<http://dx.doi.org/10.4161/cc.25591>**

**<http://www.landesbioscience.com/journals/cc/article/25591>**

A

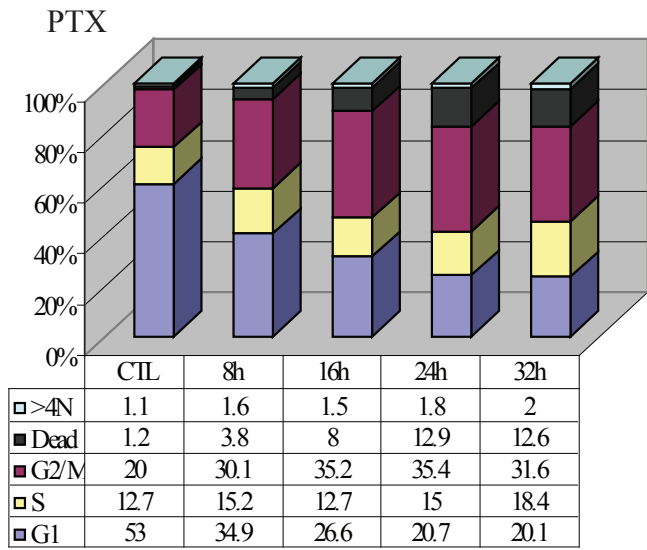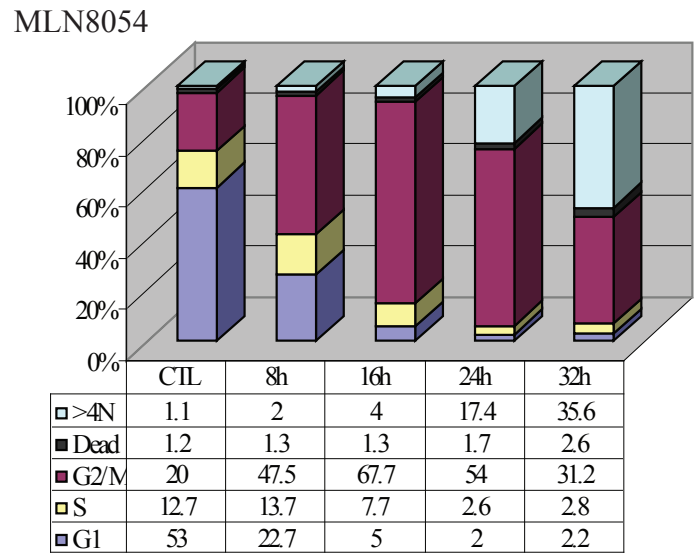

B

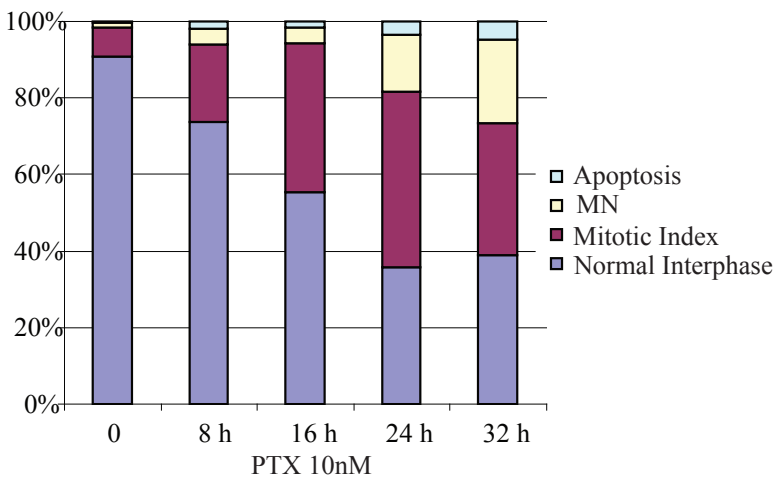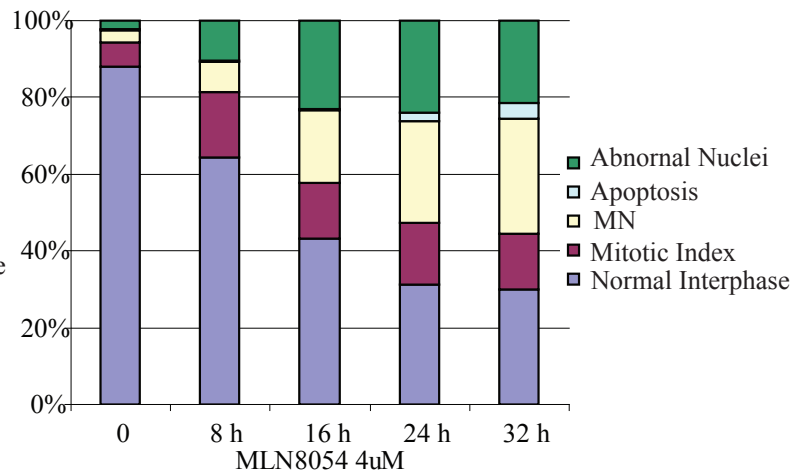

**A**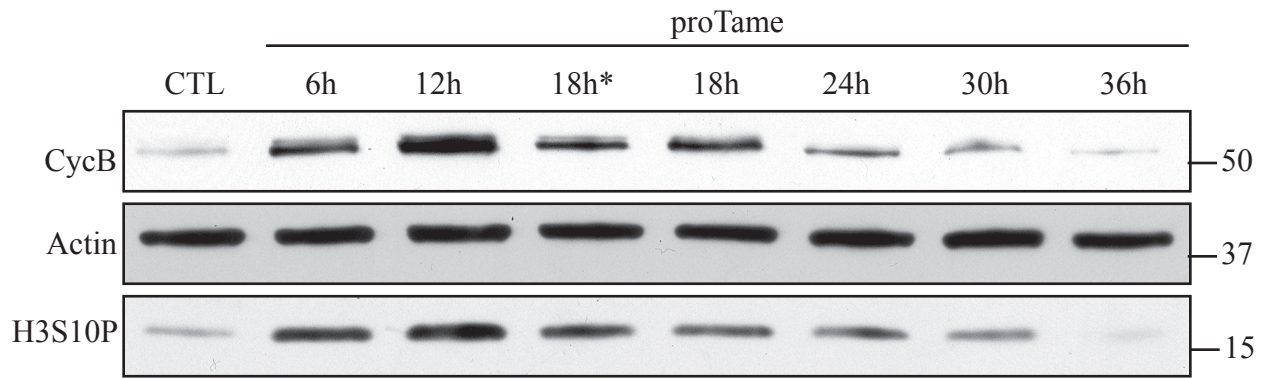**B**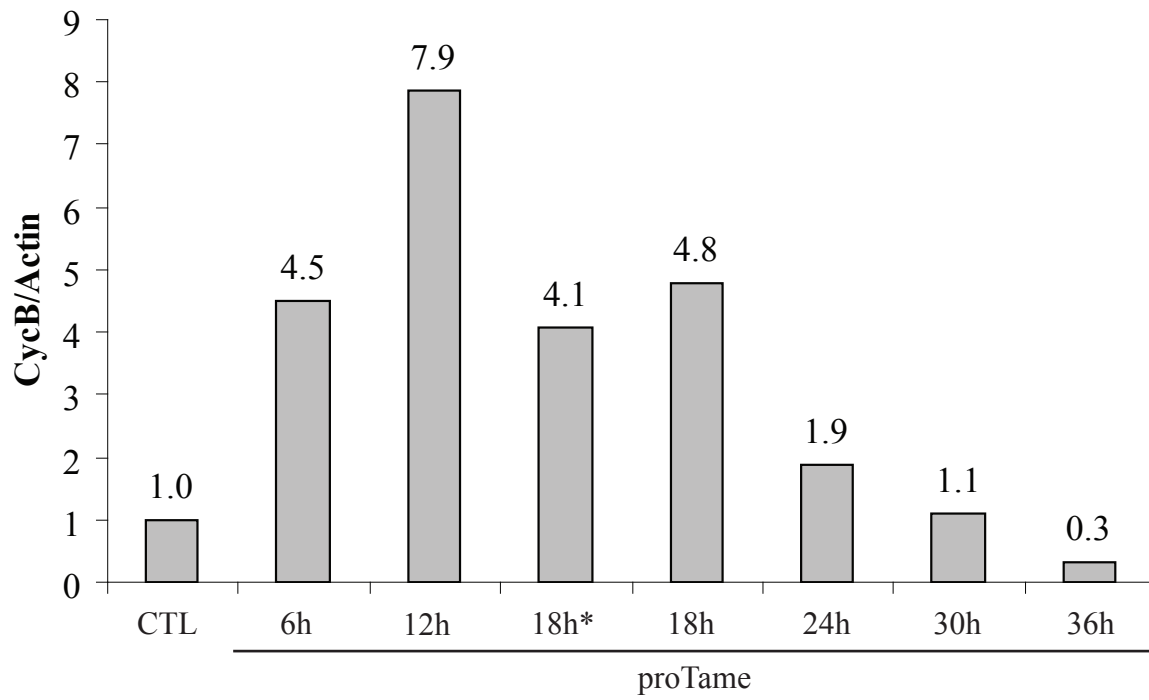

**A**

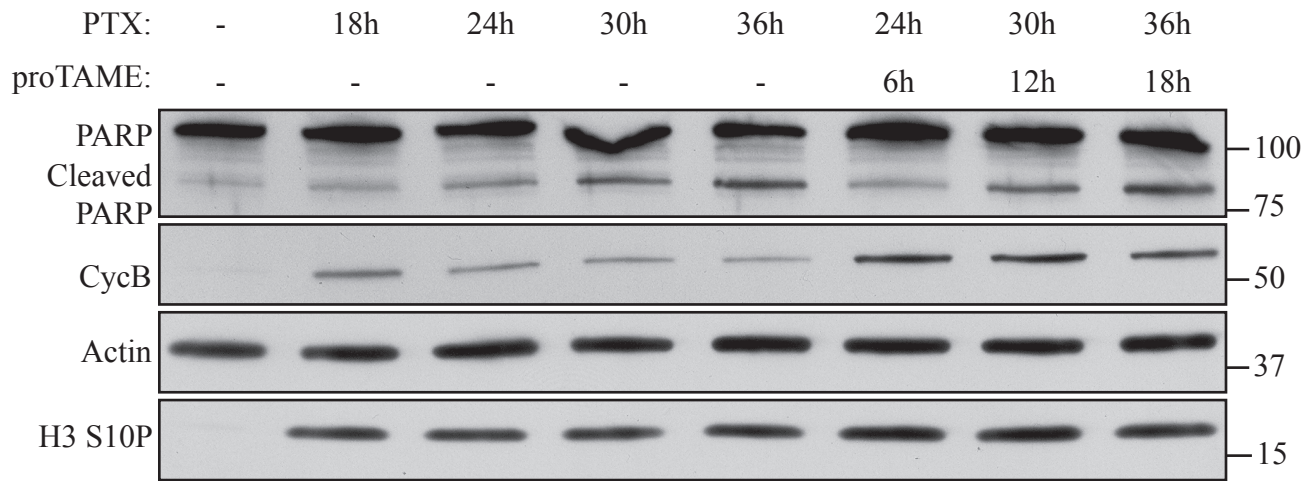

**B**

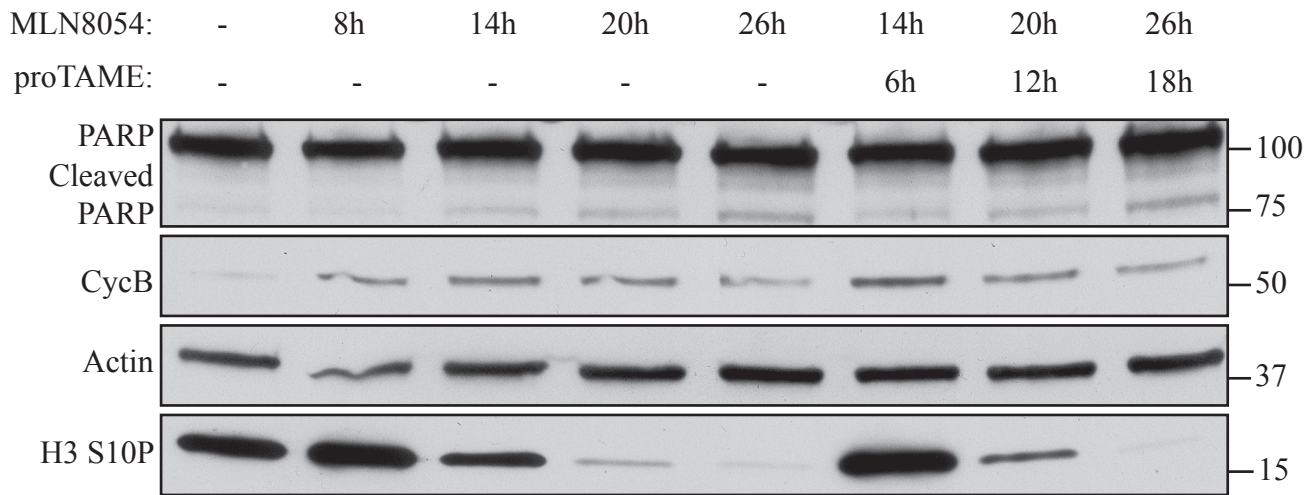

**C**

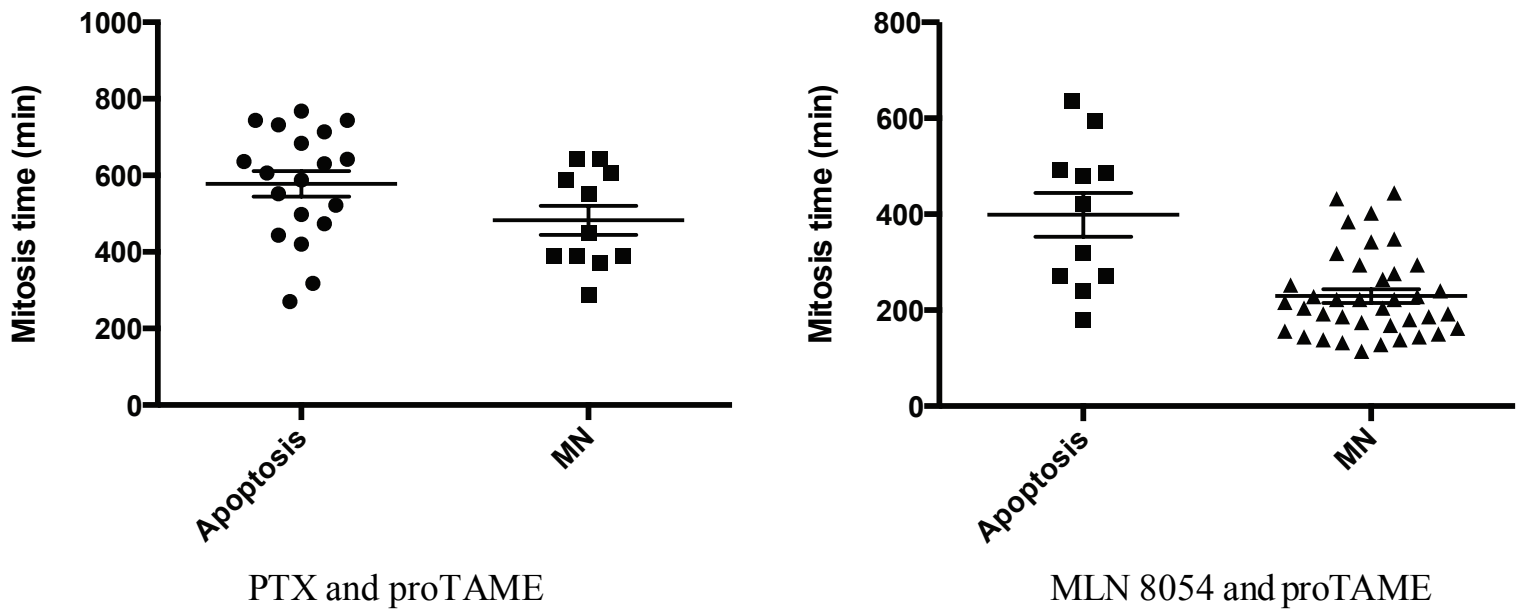

A

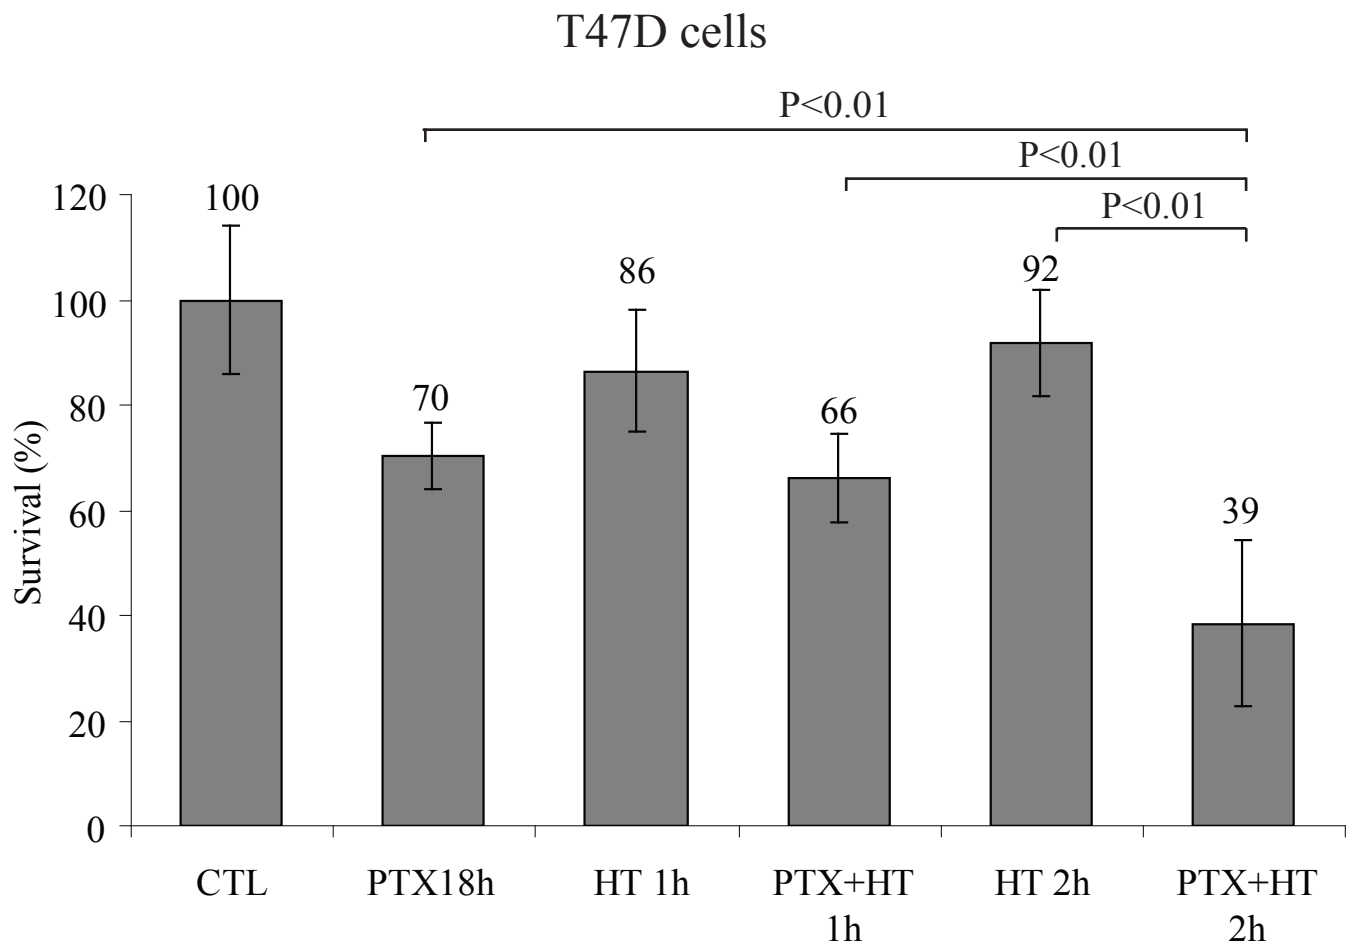

B

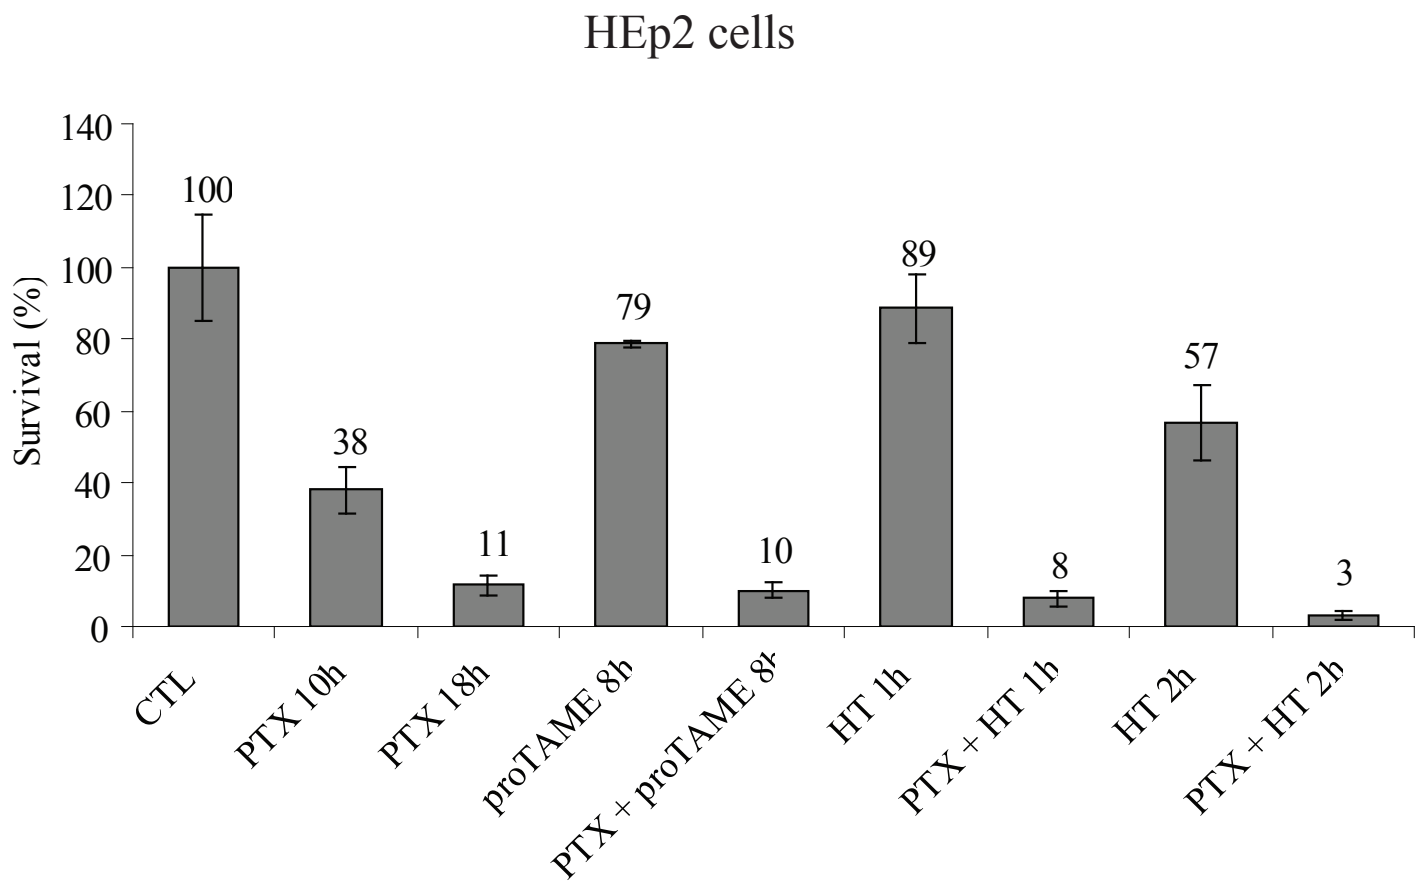

## Supplementary Figures Description

**Figure S1. Analysis of cell treated with anti-mitotic drugs.** (A) Cell cycle analysis of HEp2 cells treated for the indicated times with 10 nM PTX or 4 $\mu$ M MLN8054. DNA content was evaluated to assess cell cycle stages, vitality and polyploidy. (B) The same conditions of treatment were adopted to evaluate in HEp2 cells mitotic index, apoptosis, micronuclei (MN) formation and, for MLN8054, the presence of abnormally shaped nuclei (enlarged, doughnut shaped or with protrusions). Microscopy analysis based on DNA morphology; for each experiment at least 100 cells were counted (SD $\pm$ 5). PTX maintains consistently mitotic arrest in cells and starts to accumulate MN after 24 hours of treatment. On the opposite, the Aurora A inhibitor MLN8054, as previously reported<sup>55</sup>, blocked only transiently cells in mitosis, as indicated by lower mitotic index, and caused accumulation of cells in G2 and cells with  $\geq$ 4N DNA content.

**Figure S2. proTAME transiently blocks cells in mitosis.** (A) proTAME was added to HEp2 cells at 12  $\mu$ M for the indicated time. proTAME causes maximal accumulation of cells in mitosis at 12 hours as demonstrated by cyclin B and H3 Ser10P western blots. (B) cyclin B levels were normalized towards the internal control Actin and protein levels in the control sample. The 18 hours timepoint: cells exposed to proTAME for the first 18 hours of treatment, while the 18\* represents an internal control where proTAME was added to cells for the last 18 hours of treatment.

**Figure S3. proTAME delays mitotic exit of cells treated with anti-mitotic drugs.** Western Blots to evaluate cyclin B stability in HEp2 cells treated with 10 nM PTX (A) or 4  $\mu$ M MLN8054 (B) with or without the addition of proTAME during the last 6, 12 or 18 hours of treatment. H3 Ser10P was used as positive control of accumulation of cells in mitosis and for MNL8054 activity and PARP to monitor induction of apoptosis. (C) Scatter plots representing mitotic timing of cells that commit either apoptosis or micronucleation (MN) monitored by time-lapse microscopy. 12  $\mu$ M proTAME was added after a 12 hours pre-treatment with PTX (left,  $\pm$  SEM) or for 8 hours with MLN8054 (right, pValue<0.001,  $\pm$  SEM).

**Figure S4. HT-induced mitotic exit kills efficiently cancer cells.** (A) Survival assay of T47D cells (a cell line resistant to PTX, <sup>42</sup>) treated with 10 nM PTX for a total time of 18 hours with or without HT for 1 or 2 hours (SD±3). (B) Survival assay of HEp2 cells comparing the response of cells arrested in mitosis first by PTX and then treated with HT to trigger mitotic exit or with proTAME to prolong mitotic block. Cells were treated with PTX for a total time of 10 or 18 hours. HT was applied for the last 1 or 2 hours of PTX treatment. proTAME was added for the last 8 hours of PTX exposure (SD±3).

**Table S1. proTAME prolongs mitotic arrest and can cause apoptosis.** Table listing the mitotic timings of GFP-H2B HEp2 cells untreated, treated with PTX and MLN8054, with or without proTAME. Beside the time measurement for each event, the post-mitotic outcome is also reported. At the bottom of each column, the average mitotic timing, standard deviation and percentage of apoptotic cells (% of A) are shown.

Legend:  
D = normal division  
A = apoptosis  
MC = mitotic catastrophe

| Control            |           |
|--------------------|-----------|
| Mitotic time (min) | Cell Fate |
| 80                 | D         |
| 40                 | D         |
| 54                 | D         |
| 56                 | D         |
| 50                 | D         |
| 50                 | D         |
| 54                 | D         |
| 72                 | D         |
| 80                 | D         |
| 48                 | D         |
| 52                 | D         |
| 70                 | D         |
| 56                 | D         |
| 72                 | D         |
| 54                 | D         |
| 46                 | D         |
| 80                 | D         |
| 66                 | D         |
| 54                 | D         |
| 52                 | D         |
| 50                 | D         |
| 80                 | D         |
| 48                 | D         |
| 40                 | D         |
| 70                 | D         |
| 68                 | D         |
| 56                 | D         |
| 54                 | D         |
| 44                 | D         |
| 70                 | D         |
| 42                 | D         |
| 50                 | D         |
| 54                 | D         |
| 56                 | D         |
| 52                 | D         |
| 62                 | D         |
| 70                 | D         |
| 56                 | D         |
| 72                 | D         |
| 50                 | D         |
| 52                 | D         |
| 46                 | D         |
| 62                 | D         |
| 58                 | D         |
| 62                 | D         |
| 56                 | D         |
| 44                 | D         |
| 50                 | D         |
| 58                 | D         |
| 46                 | D         |

| PTX                |           |
|--------------------|-----------|
| Mitotic time (min) | Cell Fate |
| 222                | MC        |
| 246                | MC        |
| 198                | D         |
| 510                | MC        |
| 480                | MC        |
| 342                | MC        |
| 174                | MC        |
| 192                | MC        |
| 126                | MC        |
| 252                | MC        |
| 300                | MC        |
| 306                | MC        |
| 588                | MC        |
| 630                | MC        |
| 444                | A         |
| 426                | MC        |
| 606                | MC        |
| 234                | MC        |
| 456                | MC        |
| 516                | MC        |
| 318                | MC        |
| 624                | MC        |
| 624                | MC        |
| 488                | A         |
| 312                | MC        |
| 486                | MC        |
| 114                | MC        |
| 348                | MC        |
| 306                | MC        |
| 474                | MC        |

Average  
St Dev  
  
% of A

378.1  
157.6  
  
6.7

| PTX+proTAME        |           |
|--------------------|-----------|
| Mitotic time (min) | Cell Fate |
| 744                | A         |
| 744                | A         |
| 732                | A         |
| 474                | A         |
| 606                | A         |
| 444                | A         |
| 552                | MC        |
| 588                | A         |
| 420                | A         |
| 588                | MC        |
| 768                | A         |
| 606                | MC        |
| 390                | MC        |
| 270                | A         |
| 684                | A         |
| 318                | A         |
| 288                | MC        |
| 642                | MC        |
| 642                | MC        |
| 552                | A         |
| 390                | MC        |
| 630                | A         |
| 390                | MC        |
| 714                | A         |
| 642                | A         |
| 450                | MC        |
| 372                | MC        |
| 636                | A         |
| 498                | A         |
| 522                | A         |

Average  
St Dev  
  
% of A

543.2  
144.4  
  
63.3

| MLN8054            |           |
|--------------------|-----------|
| Mitotic time (min) | Cell Fate |
| 576                | MC        |
| 144                | MC        |
| 102                | MC        |
| 210                | MC        |
| 132                | MC        |
| 102                | MC        |
| 222                | MC        |
| 72                 | MC        |
| 144                | MC        |
| 174                | MC        |
| 204                | MC        |
| 180                | MC        |
| 348                | MC        |
| 94                 | MC        |
| 144                | MC        |
| 414                | MC        |
| 126                | MC        |
| 114                | MC        |
| 216                | MC        |
| 132                | MC        |
| 204                | MC        |
| 306                | MC        |
| 408                | MC        |
| 246                | MC        |
| 120                | MC        |
| 120                | MC        |
| 234                | MC        |
| 228                | MC        |
| 330                | MC        |
| 300                | MC        |
| 354                | MC        |
| 138                | MC        |
| 174                | MC        |
| 138                | MC        |
| 270                | MC        |
| 262                | MC        |
| 294                | MC        |
| 228                | MC        |
| 90                 | MC        |
| 120                | MC        |
| 210                | MC        |
| 336                | MC        |
| 156                | MC        |
| 474                | MC        |
| 210                | MC        |
| 120                | MC        |
| 234                | MC        |
| 186                | MC        |
| 318                | MC        |
| 138                | MC        |

Average  
St Dev  
  
% of A

215.9  
107.4  
  
0

| MLN8054+proTAME    |           |
|--------------------|-----------|
| Mitotic time (min) | Cell Fate |
| 284                | MC        |
| 276                | MC        |
| 128                | MC        |
| 204                | MC        |
| 186                | MC        |
| 240                | A         |
| 270                | A         |
| 240                | MC        |
| 222                | MC        |
| 186                | MC        |
| 114                | MC        |
| 348                | MC        |
| 162                | MC        |
| 144                | MC        |
| 222                | MC        |
| 138                | MC        |
| 270                | A         |
| 138                | MC        |
| 636                | A         |
| 372                | MC        |
| 342                | MC        |
| 420                | A         |
| 486                | A         |
| 144                | MC        |
| 294                | MC        |
| 216                | MC        |
| 252                | MC        |
| 294                | MC        |
| 402                | MC        |
| 492                | A         |
| 480                | A         |
| 384                | MC        |
| 180                | A         |
| 444                | MC        |
| 174                | MC        |
| 594                | A         |
| 432                | MC        |
| 318                | A         |
| 222                | MC        |
| 318                | MC        |
| 228                | MC        |
| 132                | MC        |
| 180                | MC        |
| 192                | MC        |
| 156                | MC        |
| 150                | MC        |
| 204                | MC        |
| 192                | MC        |
| 168                | MC        |
| 228                | MC        |

Average  
St Dev  
  
% of A

269.6  
107.4  
  
22.0

Average  
St Dev  
  
% of A

56.1  
9.4  
  
0
